# Supplementary material for: Etiological involvement of KCND1 variants in an X-linked neurodevelopmental disorder with variable expressivity
Source: PubMed Central journal article supplement (PMC11179411; doi:10.1016/j.ajhg.2024.04.019), 2024-05-20
Supplement: mmc1.pdf [file mmc1.pdf]

## Supplemental information

### **Etiological involvement of *KCND1* variants in an X-linked neurodevelopmental disorder with variable expressivity**

**Tassja Kalm, Claudia Schob, Hanna Völler, Thatjana Gardeitchik, Christian Gilissen, Rolph Pfundt, Chiara Klöckner, Konrad Platzer, Annick Klabunde-Cherwon, Markus Ries, Steffen Syrbe, Francesca Beccaria, Francesca Madia, Marcello Scala, Federico Zara, Floris Hofstede, Marleen E.H. Simon, Richard H. van Jaarsveld, Renske Oegema, Koen L.I. van Gassen, Sjoerd J.B. Holwerda, Tahsin Stefan Barakat, Arjan Bouman, Marjon van Slegtenhorst, Sara Álvarez, Alberto Fernández-Jaén, Javier Porta, Andrea Accogli, Margherita Maria Mancardi, Pasquale Striano, Michele Iacomino, Jong-Hee Chae, SeSong Jang, Soo Y. Kim, David Chitayat, Saadet Mercimek-Andrews, Christel Depienne, Antje Kampmeier, Alma Kuechler, Harald Surowy, Enrico Silvio Bertini, Francesca Clementina Radio, Cecilia Mancini, Simone Pizzi, Marco Tartaglia, Lucas Gauthier, David Genevieve, Mylène Tharreau, Noy Azoulay, Gal Zaks-Hoffer, Nesia K. Gilad, Naama Orenstein, Geneviève Bernard, Isabelle Thiffault, Jonas Denecke, Theresia Herget, Fanny Kortüm, Christian Kubisch, Robert Bähring, and Stefan Kindler**

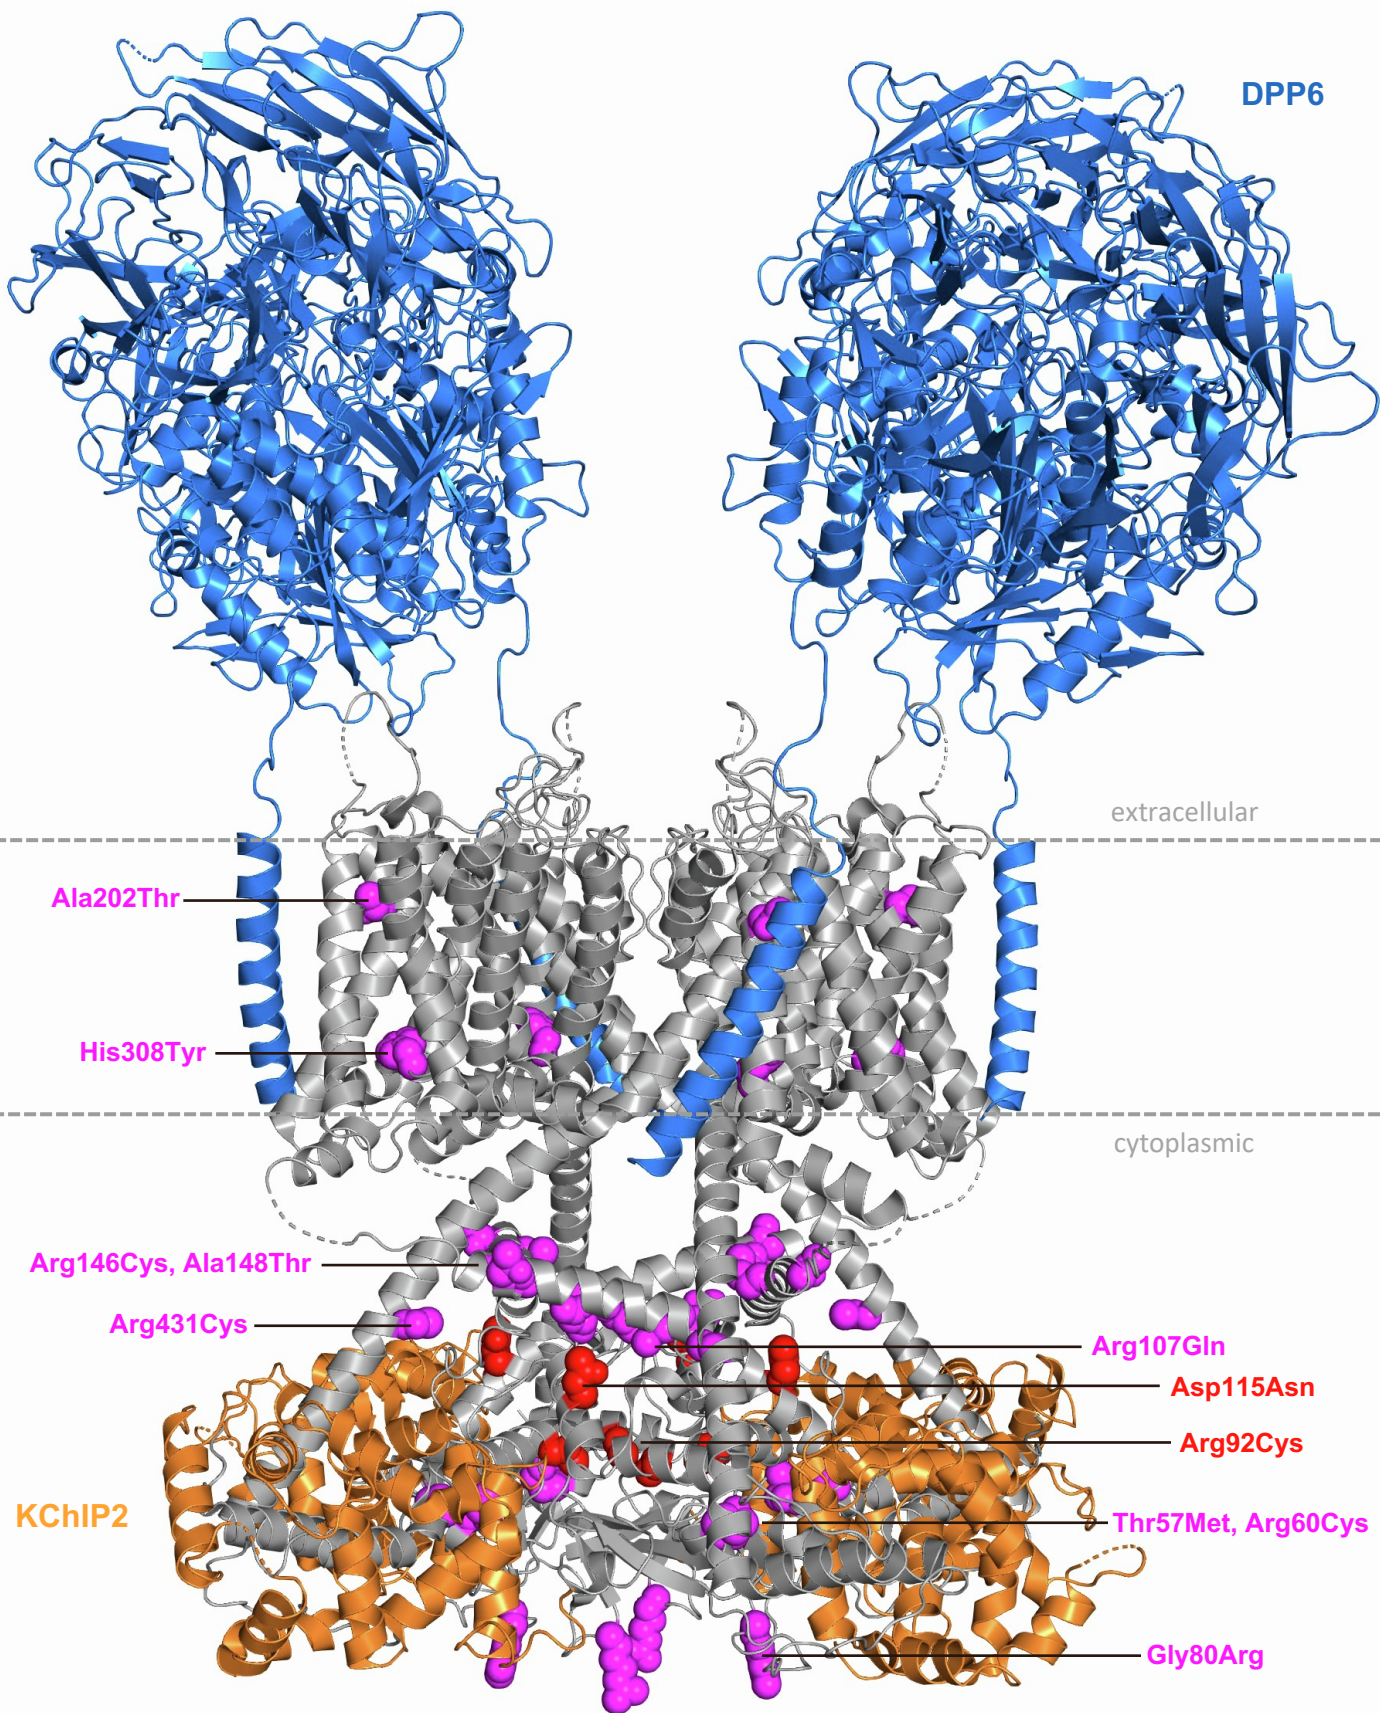

**Figure S1. Structure of the ternary Kv4/KChIP/DPP channel complex**

The structure of the Kv4.2/KChIP1/DPP6 complex reported by Kise and co-workers (PDB ID 7E8H)<sup>1</sup> was used to give an overview of the ternary channel configuration ( $\alpha$ -subunits: grey, KChIPs: orange, DPPs: blue) and the location of *KCND1* variant-associated amino acid substitutions. Amino acid exchanges at sites homologous to Kv4.1 were simulated with the most likely backbone-dependent rotamer orientation using PyMOL (Schrödinger). Protein backbones depicted as ribbon diagrams. Substituted amino acid side chains depicted as red (group 1 variants) or purple (group 2 variants) CPK models. In each case one of the four corresponding substitutions is indicated and labeled (unlabeled structure also available as Movie S1). Note that p.Thr516Ser, p.Arg536Gly and p.Asn578Ile are absent because the structure lacks the C-terminal ends of the  $\alpha$ -subunits. Horizontal dotted lines indicate the location of the plasma membrane separating extracellular from cytoplasmic space.

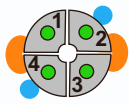

Structural homology modeling:

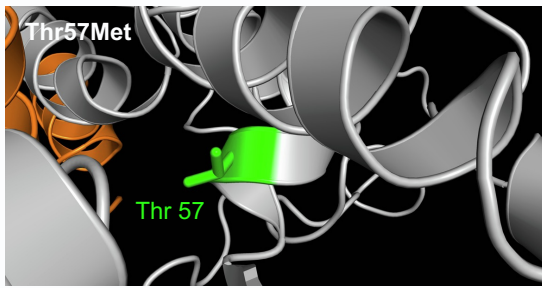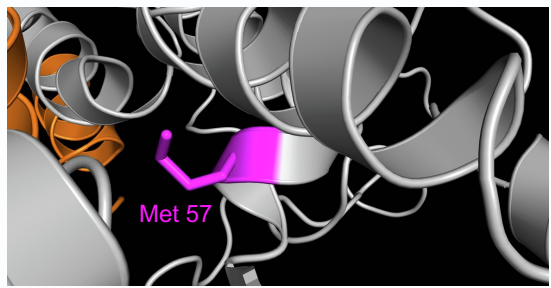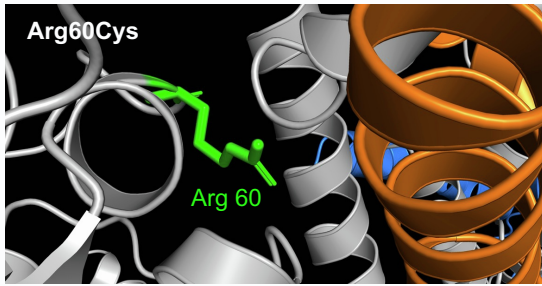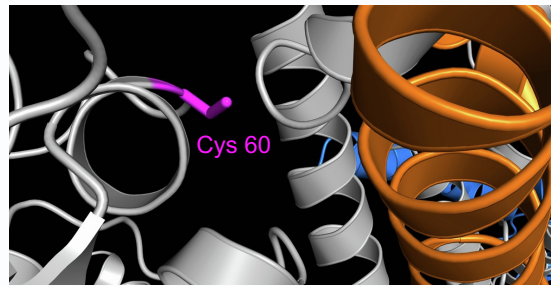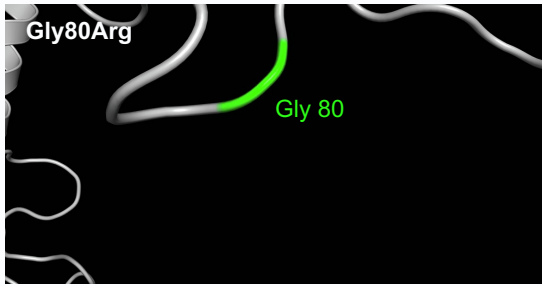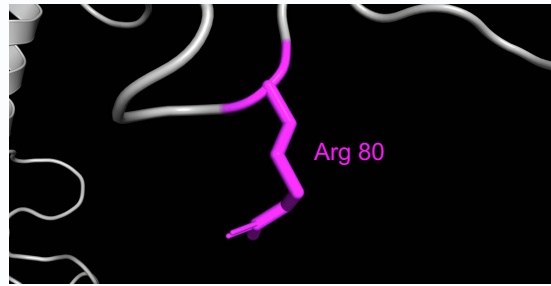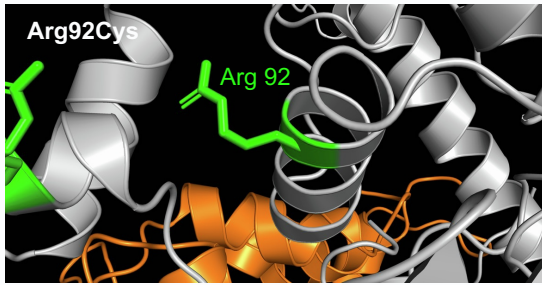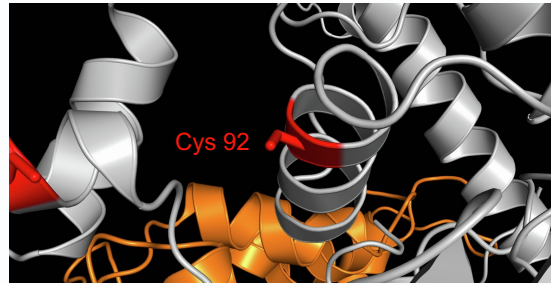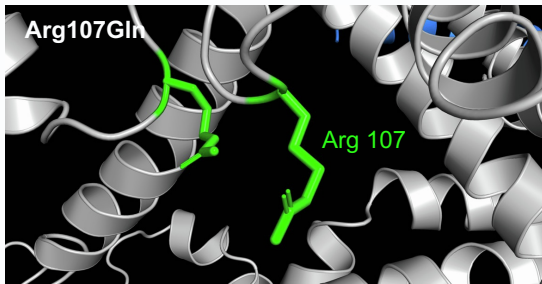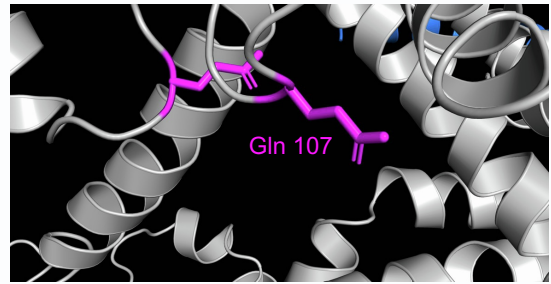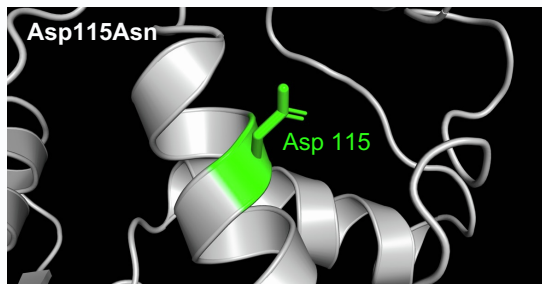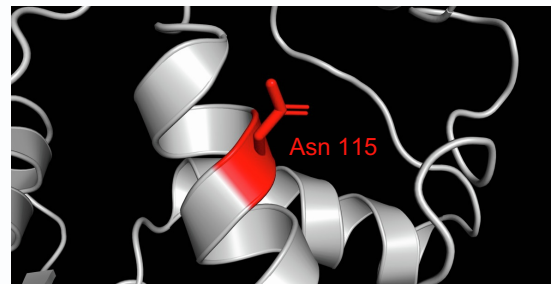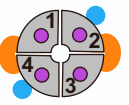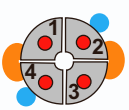

Structural homology modeling:



Structural homology modeling:

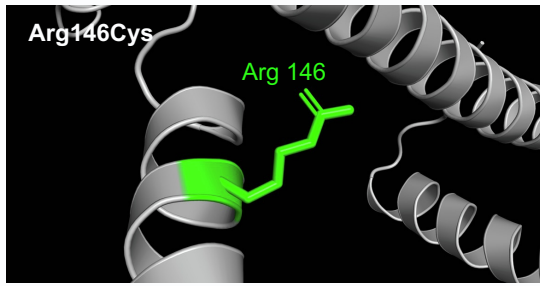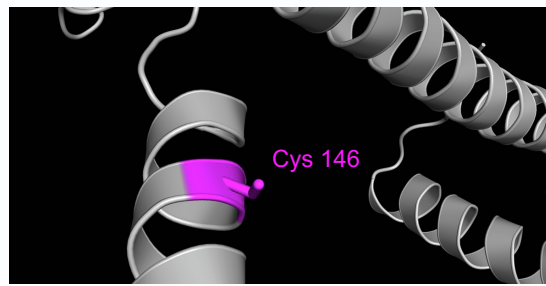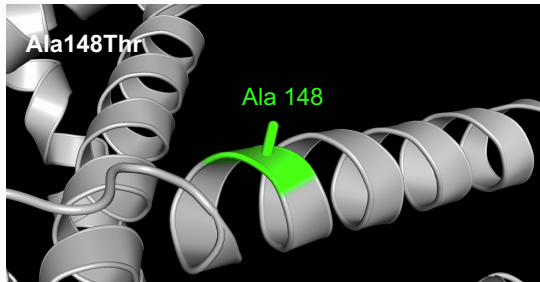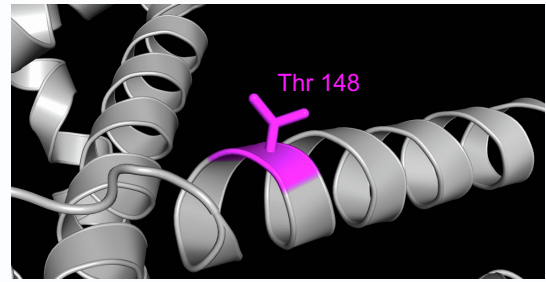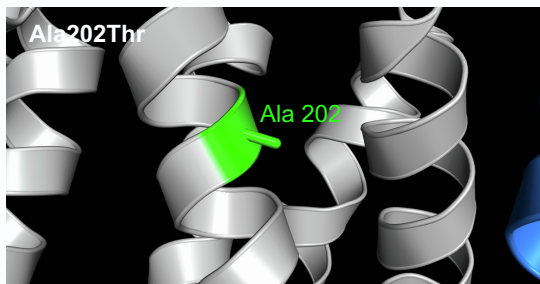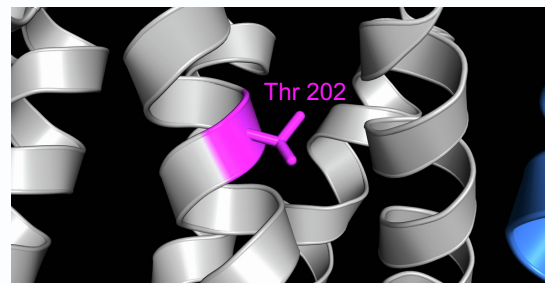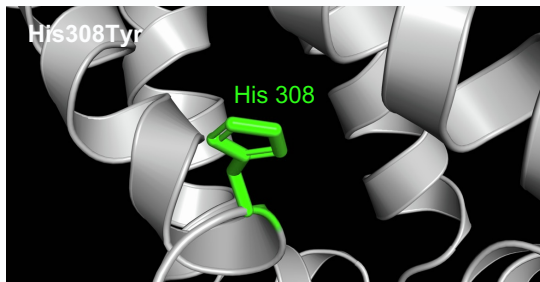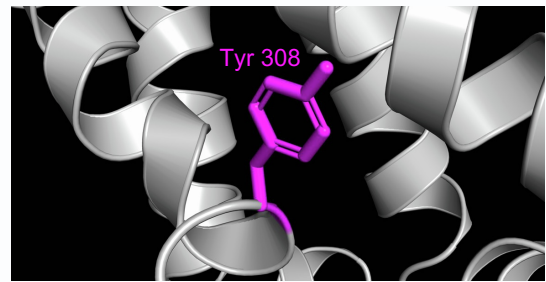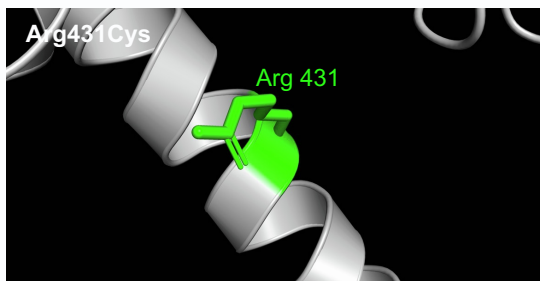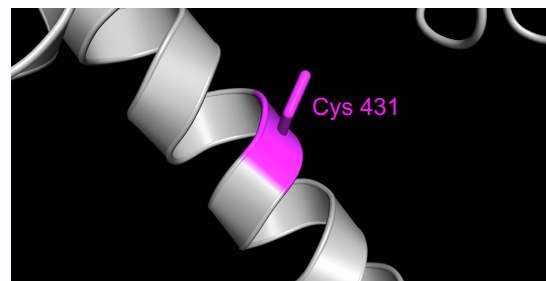

Structural homology modeling:

**Figure S2. Structural side chain modification caused by *KCND1* variant-associated amino acid substitutions**

Structural homology modeling using UniProt (<https://www.uniprot.org/>), SWISS MODEL (Center for Molecular Life Sciences, University of Basel, Switzerland; <https://swissmodel.expasy.org/>) and PyMOL (Schrödinger), was performed based on the amino acid sequences of human Kv4.1 (UniProt identifier: Q9NSA2), KChIP2 (UniProt identifier: Q9NS61) and DPP6 (UniProt identifier: P42658), and the ternary Kv4.2/KChIP1/DPP6 structure reported by Kise and co-workers (PDB ID 7E8H).<sup>1</sup> The structure provided by homology modeling was incomplete showing a 4:2:2 stoichiometry due to the lack of two opposite KChIP and DPP molecules (see cartoons). Computer-simulated amino acid substitutions using PyMOL (Schrödinger) were done with consideration of the most likely backbone-dependent rotamer orientation, and the putative steric consequences of the amino acid substitution within a distance of 8 Å were taken into account. Protein backbones depicted as ribbon diagrams. Native (wild-type) and novel variant-associated side chains depicted in stick mode, native residues in green, mutated residues in red (group 1 variants) or purple (group 2 variants).

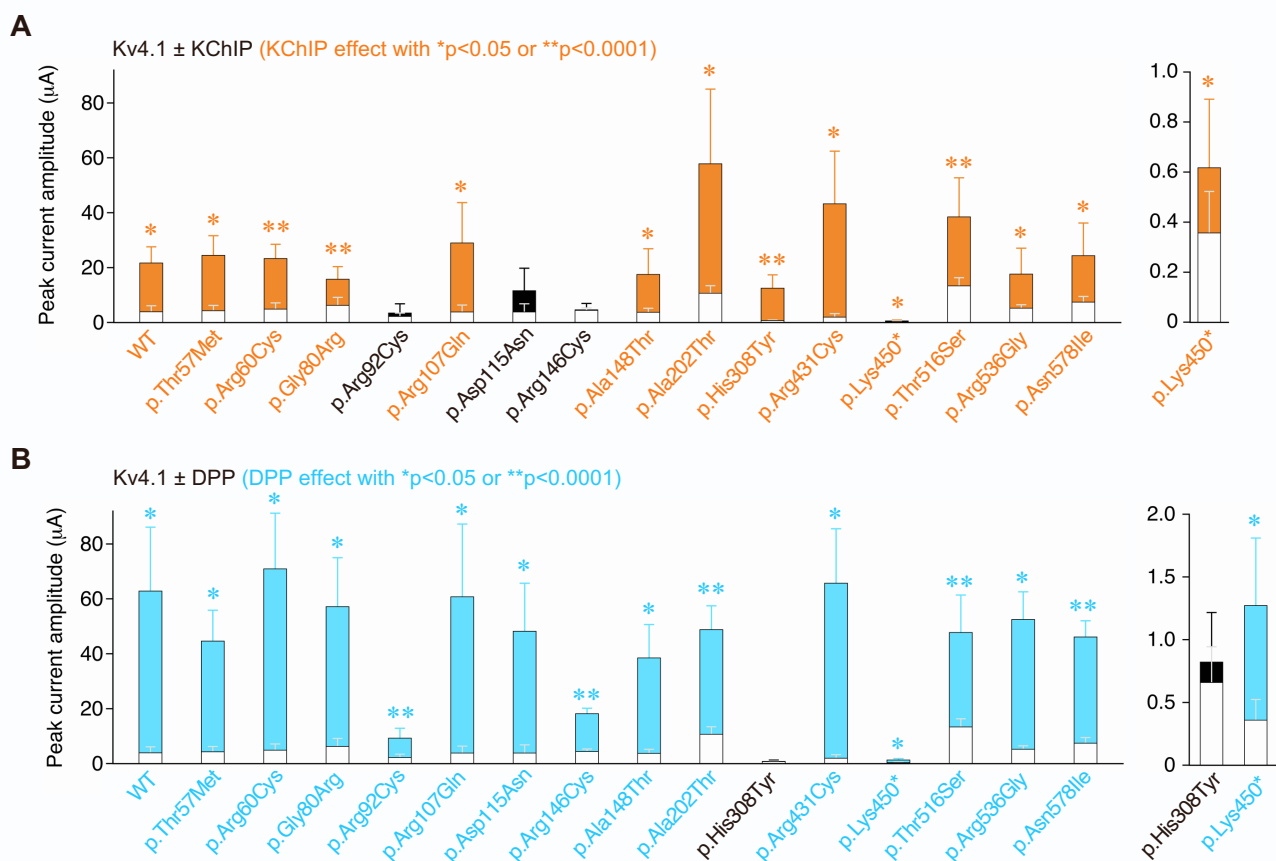

**Figure S3. Effects of auxiliary  $\beta$ -subunit co-expression on Kv4.1 channel-mediated peak current amplitudes**

Mean peak current amplitudes (data from Tables S4 – S6; error bars are SD) obtained in the absence (empty bars) and presence of either KChIP or DPP, as indicated by the filled bar extensions.

(A) Effects of KChIP co-expression; p.Lys450\* data plotted on two different y-scales;

(B) Effects of DPP co-expression; p.His308Tyr and p.Lys450\* data plotted on two different y-scales;

Statistics are based on unpaired Student's *t*-tests, applied to the data from Tables S4 – S6; significant effects of auxiliary  $\beta$ -subunit co-expression (compared to Kv4.1 alone) are indicated with \* ( $p < 0.05$ ) or \*\* ( $p < 0.0001$ ) and by color (significant KChIP effect: orange; significant DPP effect: blue; absence of or non-significant effects: black). Note that the typical increase in peak current amplitude caused by both KChIP and DPP co-expression,<sup>2,3</sup> as seen for Kv4.1 WT and the majority of variants, is absent in the case of p.Arg92Cys, p.Asp115Asn and p.Arg146Cys for KChIP co-expression, and in the case of p.His308Tyr for DPP co-expression.

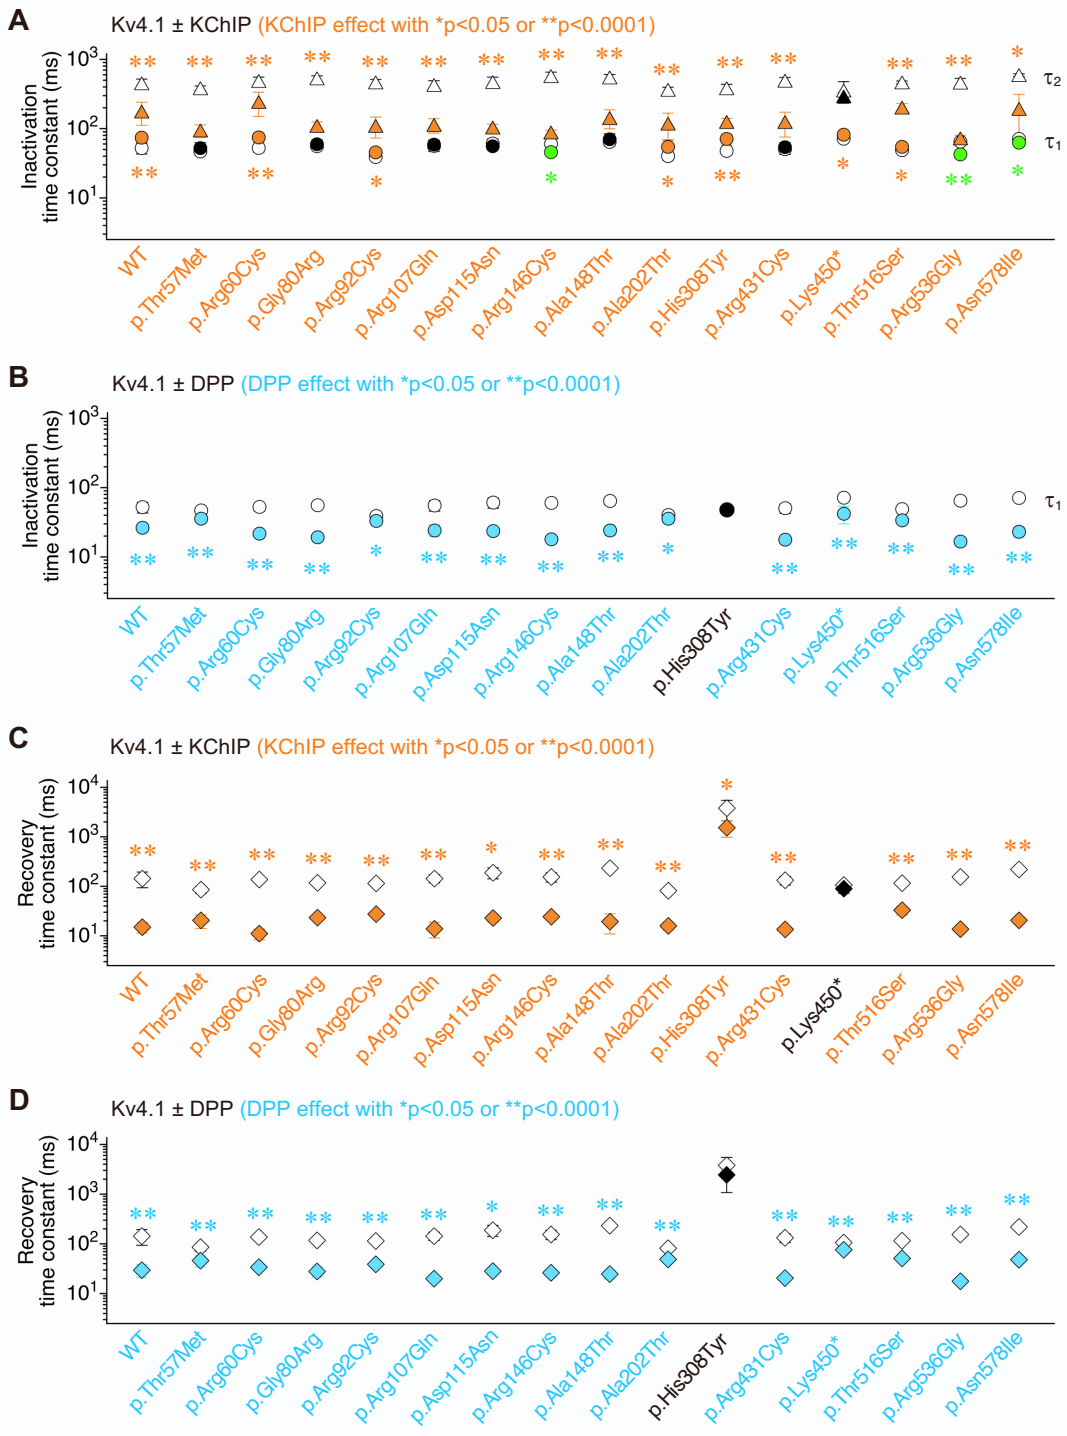

**Figure S4. Effects of auxiliary  $\beta$ -subunit co-expression on Kv4.1 channel macroscopic inactivation and recovery kinetics**

Mean values of inactivation and recovery time constants (data from Tables S4 – S6, error bars are SD and in many cases smaller than symbols) obtained in the absence (empty symbols) and presence of either KChIP or DPP (filled symbols).

(A and C) Effects of KChIP co-expression;

(B and D) Effects of DPP co-expression;

Statistics are based on unpaired Student's  $t$ -tests, applied to the data from Tables S4 – S6; significant effects of auxiliary  $\beta$ -subunit co-expression (compared to Kv4.1 alone) are indicated with \* ( $p < 0.05$ ) or \*\* ( $p < 0.0001$ ) and by color (significant KChIP effect: orange; significant DPP effect: blue; absence of or non-significant effects: black). Typically, KChIP causes a slowing of the initial (fast) and an acceleration of the second (slower) current decay component ( $\tau_1$  and  $\tau_2$  depicted as circles and triangles, respectively), whereas DPP causes an acceleration of the initial (fast) current decay component ( $\tau_1$ ), while both KChIP and DPP speed up recovery from inactivation.<sup>2,3</sup> These typical modifications were seen for Kv4.1 WT and, at least partially, for the majority of variants. Still, for p.Lys450\* KChIP failed to accelerate the recovery kinetics, and for p.His308Tyr none of the typical DPP effects was seen. Notably, in the case of p.Arg146Cys, p.Arg536Gly and p.Asn578Ile KChIP caused an acceleration of the initial current decay component (filled green symbols).

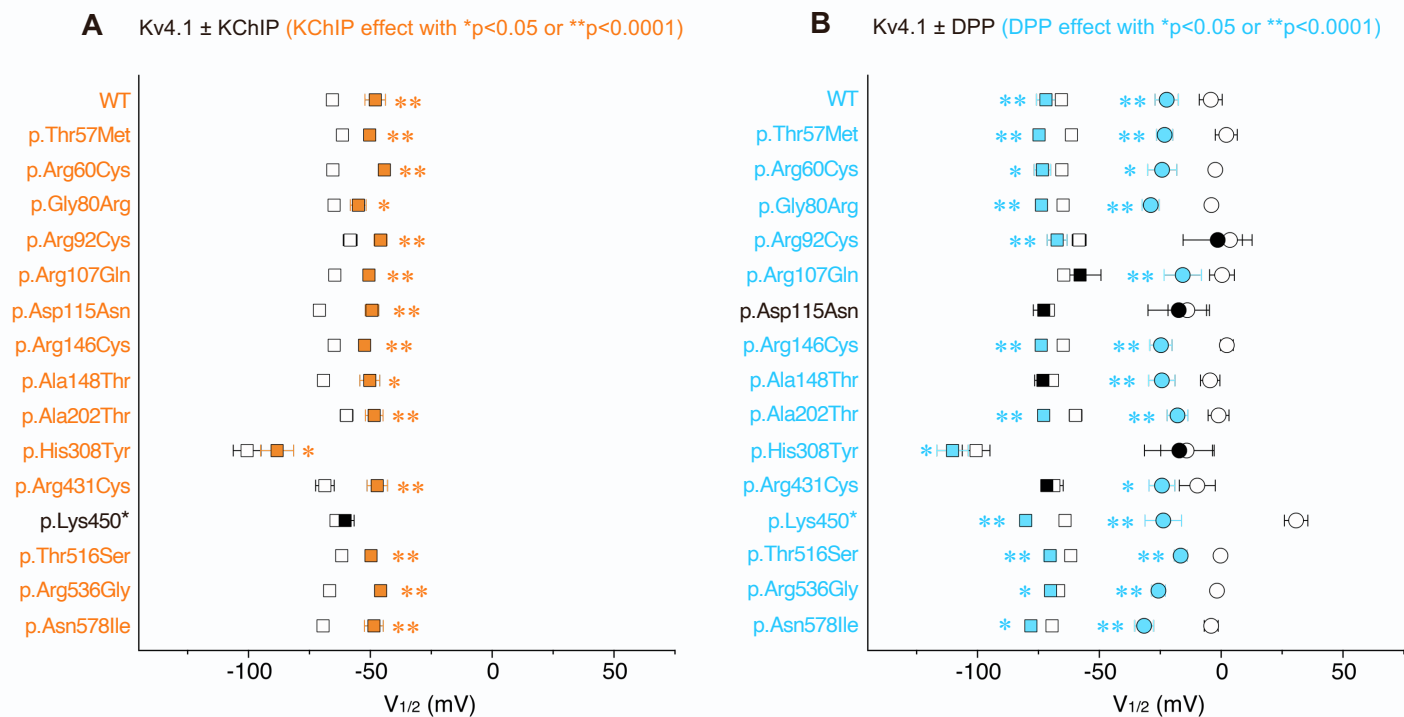

**Figure S5. Effects of auxiliary  $\beta$ -subunit co-expression on the voltage dependences of Kv4.1 channel activation and steady-state inactivation**

Mean values obtained for the voltages of halfmaximal activation and inactivation (data from Tables S4 – S6; error bars are SD and in many cases smaller than symbols) obtained in the absence (empty symbols) and in the presence of either KChIP or DPP (filled symbols).

(A) Effects of KChIP co-expression;

(B) Effects of DPP co-expression;

Statistics are based on unpaired Student's  $t$ -tests, applied to the data from Tables S4 – S6; significant effects of auxiliary  $\beta$ -subunit co-expression (compared to Kv4.1 alone) are indicated with \* ( $p < 0.05$ ) or \*\* ( $p < 0.0001$ ) and by color (significant KChIP effect: orange; significant DPP effect: blue; absence of or non-significant effects: black). Typically KChIP causes a positive shift of the inactivation curve, and DPP a negative shift of both activation and inactivation curve,<sup>2,3</sup> as seen for Kv4.1 WT and, at least partially, for the majority of variants. However, in the case of p.Lys450\* KChIP failed to significantly shift the inactivation curve in the positive direction, and in the case of p.Asp115Asn DPP failed to significantly shift both curves in the negative direction.

| Individual #                        | 1                                     | 2                                                              | 3                                                                                                                 | 4                                                      | 5                              | 6                                                                                               | 7                                  | 8                                                                   | 9                                                                    |
|-------------------------------------|---------------------------------------|----------------------------------------------------------------|-------------------------------------------------------------------------------------------------------------------|--------------------------------------------------------|--------------------------------|-------------------------------------------------------------------------------------------------|------------------------------------|---------------------------------------------------------------------|----------------------------------------------------------------------|
| Mutation (NM_004979.6; NP_004970.3) | c.274C>T (p.Arg92Cys)                 | c.343G>A (p.Asp115Asn)                                         | c.182_194del (p.Tyr61Cysfs*31)                                                                                    | c.295C>T (p.Arg99*)                                    | c.1348A>T (p.Lys450*)          | c.170C>T (p.Thr57Met)                                                                           | c.178C>T (p.Arg60Cys)              | c.238G>C (p.Gly80Arg)                                               | c.320G>A (p.Arg107Gln)                                               |
| Origin                              | <i>de novo</i>                        | <i>de novo</i>                                                 | MI                                                                                                                | MI                                                     | MI                             | MI                                                                                              | MI                                 | MI                                                                  | MI                                                                   |
| Additional candidate variants       | none                                  | none                                                           | none                                                                                                              | none                                                   | none                           | TCEAL2: c.595C>T (p.Gln199*), NM_080390.4, homozygous                                           | none                               | AREG: c.440delA (p.Asn147Metfs*16), NM_001657.4, heterozygous       | none                                                                 |
| Birth weight (z, date of birth)     | RN (40.5 wks)                         | ND (39.7 wks)                                                  | RN (at term)                                                                                                      | 2680 g (-0.79, 36.7 wks)                               | 3262 g (-0.99, 40.7 wks)       | 4210 g (1.33, 40 wks)                                                                           | 3000 g (-1.25, 39.5 wks)           | 2100 g (-0.57, 34 wks)                                              | 2350 g (-2.2, 38 wks)                                                |
| Birth length (z)                    | ND                                    | ND                                                             | RN                                                                                                                | ND                                                     | 52 cm (-0.4)                   | ND                                                                                              | ND                                 | ND                                                                  | ND                                                                   |
| OFC birth (z)                       | ND                                    | ND                                                             | RN                                                                                                                | ND                                                     | ND                             | ND                                                                                              | ND                                 | ND                                                                  | ND                                                                   |
| Age last exam                       | 15 y                                  | 9 y 11 m                                                       | 16 y                                                                                                              | 16 y                                                   | 3 y 2m                         | 5 y 6 m                                                                                         | 3 y 6 m                            | 16 y                                                                | 7 y                                                                  |
| Weight last exam (z)                | 74 kg (1.1)                           | 28.6 kg (-0.34)                                                | ND                                                                                                                | 45.6 kg (-2.34)                                        | 15.5 kg (0.25)                 | 23.5 kg (0.95)                                                                                  | 15.9 kg (0.14)                     | 46 kg (-2.28)                                                       | ND                                                                   |
| Height last exam (z)                | 185.5 cm (1.54)                       | 132.5 cm (-0.56)                                               | ND                                                                                                                | 169 cm (-1.02)                                         | 96.4 cm (-0.5)                 | 118 cm (0.58)                                                                                   | 99.2 cm (-0.29)                    | 166 cm (-1.42)                                                      | ND                                                                   |
| OFC at last exam (z)                | ND                                    | 55.5 cm (1.71)                                                 | ND                                                                                                                | RN                                                     | 50.7 cm (-0.09)                | 52 cm (0.07)                                                                                    | 50.5 cm (-0.36)                    | 54 cm (-1.57)                                                       | ND                                                                   |
| Age at first signs                  | 10 y                                  | 6 y                                                            | 2 y 3 m                                                                                                           | abt 2 y                                                | neonatal period                | abt 3 y                                                                                         | abt 2 y                            | 3 y                                                                 | 4 y 10 m                                                             |
| First signs                         | anxiety, tics                         | speech delay, seizures                                         | seizures                                                                                                          | speech delay, motor delay, anxiety                     | speech delay, motor delay      | speech delay, mild motor delay                                                                  | speech delay, mild motor delay     | speech delay, autistic features                                     | seizures (motor, with impaired awareness)                            |
| Motor development                   | normal                                | normal                                                         | normal                                                                                                            | delayed                                                | delayed                        | mildly delayed                                                                                  | mildly delayed                     | normal                                                              | normal                                                               |
| Intellectual development            | average                               | low average, TIQ 85                                            | average                                                                                                           | borderline mental functioning – low average, TIQ 74-86 | extremely low/impaired, TIQ 68 | WNV of Bayley-III-NL could not be completed, developmental age estimate at 53 m of age: 20-42 m | extremely low/impaired, TIQ 55     | extremely low/impaired, TIQ <50, WISC-IV 43 (7 y), WISC-V 41 (13 y) | average                                                              |
| Speech development                  | normal                                | delayed                                                        | normal                                                                                                            | delayed                                                | delayed                        | delayed                                                                                         | delayed                            | delayed, pragmatic language disorder                                | mildly delayed                                                       |
| Receptive language                  | normal                                | below average                                                  | normal                                                                                                            | below average                                          | below average                  | poor                                                                                            | ND                                 | ND                                                                  | ND                                                                   |
| Comprehension                       | normal                                | below average                                                  | normal                                                                                                            | below average                                          | below average                  | below average                                                                                   | below average                      | below average                                                       | below average                                                        |
| Neuropsychiatric signs              | ASD, attention deficit, anxiety, tics | attention deficit                                              | none                                                                                                              | ASD, anxiety, emotional problems                       | attention deficit              | poor social skills, little contact, attention deficit                                           | past temper tantrums               | ASD, hyperactivity, attention deficit                               | hyperactivity, attention deficit                                     |
| Ambulation/gait                     | normal                                | normal                                                         | normal                                                                                                            | normal                                                 | normal                         | clumsy gait <sup>a</sup>                                                                        | normal                             | normal                                                              | normal                                                               |
| Neurological and muscular features  | none                                  | mild hypotonia                                                 | none                                                                                                              | ND                                                     | none                           | none                                                                                            | probably mild hypotonia in infancy | hypotonia                                                           | none                                                                 |
| Seizures/epilepsy                   | no                                    | epilepsy, absences, myoclonus, eyelid myoclonia                | epilepsy, generalized tonic-clonic seizures during sleep until 11 y, then seizures remitted, Valproate responsive | no                                                     | no                             | no                                                                                              | no                                 | no                                                                  | epilepsy, multiple daily seizures, psychomotor arrest, eye deviation |
| EEG                                 | normal                                | irregular polyspikes and spike-waves, photoparoxysmal reaction | generalized abnormalities at 3 y 8 m, normal at 12 y 6 m                                                          | ND                                                     | ND                             | ND                                                                                              | ND                                 | normal                                                              | irregular polyspikes and spike-waves                                 |
| Cerebral MRI                        | normal                                | normal                                                         | normal                                                                                                            | ND                                                     | ND                             | ND                                                                                              | ND                                 | normal                                                              | ND                                                                   |



| Individual #                        | 10                                                                                    | 11                             | 12                                                                                                                                    | 13                                                                                                                    | 14 <sup>b</sup>                                                                                                                           | 15 <sup>c</sup>                        | 16 <sup>c</sup>                          | 17                               | 18                                                               |
|-------------------------------------|---------------------------------------------------------------------------------------|--------------------------------|---------------------------------------------------------------------------------------------------------------------------------------|-----------------------------------------------------------------------------------------------------------------------|-------------------------------------------------------------------------------------------------------------------------------------------|----------------------------------------|------------------------------------------|----------------------------------|------------------------------------------------------------------|
| Mutation (NM_004979.6; NP_004970.3) | c.436C>T (p.Arg146Cys)                                                                | c.442G>A (p.Ala148Thr)         | c.604G>A (p.Ala202Thr)                                                                                                                | c.922C>T (p.His308Tyr)                                                                                                | c.1291C>T (p.Arg431Cys)                                                                                                                   | c.1546A>T (p.Thr516Ser)                | c.1546A>T (p.Thr516Ser)                  | c.1606A>G (p.Arg536Gly)          | c.1733A>T (p.Asn578Ile)                                          |
| Origin                              | MI                                                                                    | MI                             | MI                                                                                                                                    | MI                                                                                                                    | MI                                                                                                                                        | MI                                     | MI                                       | MI                               | MI                                                               |
| Additional candidate variants       | none                                                                                  | none                           | <i>EIF2B3</i> : c.172delG (p.Asp58Metfs*12), NM_020365.5, heterozygous; <i>SYNE1</i> : c.18891+2T>C, NM_182961.4, heterozygous        | <i>HAGHL</i> : c.55G>A (p.Glu19Lys), NM_207112.2, heterozygous                                                        | none                                                                                                                                      | none                                   | none                                     | none                             | <i>AMER1</i> : c.3112C>T (p.Pro1038Ser), NM_152424.4, hemizygous |
| Birth weight (z, date of birth)     | ND (at term)                                                                          | 2300 g (-1.26, 37 wks)         | 3543 g (0.13, 39 wks)                                                                                                                 | 2650 g (-1.81, 38.7 wks)                                                                                              | 3300 g (-0.14, at term)                                                                                                                   | 3470 g (-0.38, 40 wks)                 | 2680 g (-1.86, 39 wks)                   | 3180 g (-0.16, 37.7 wks)         | 2050 g (-2.37, 37 wks)                                           |
| Birth length (z)                    | ND                                                                                    | ND                             | 52 cm (0.04)                                                                                                                          | 48 cm (-1.6)                                                                                                          | 51 cm (-0.14)                                                                                                                             | 50 cm (-1.12)                          | 46 cm (-2.57)                            | 48 cm (-1.12)                    | 46 cm (-1.75)                                                    |
| OFC birth (z)                       | ND                                                                                    | ND                             | 35 cm (-0.23)                                                                                                                         | 34 cm (-0.9)                                                                                                          | 35 cm (-0.01)                                                                                                                             | 34.5 cm (-0.88)                        | 34 cm (-1)                               | ND                               | 31 cm (-2.27)                                                    |
| Age last exam                       | 21 y                                                                                  | 5 y                            | 6 y 11 m                                                                                                                              | 1 y 9 m                                                                                                               | 8 m                                                                                                                                       | 11 y 8 m                               | 6 y 4 m                                  | 10 y 1 m                         | 3 y                                                              |
| Weight last exam (z)                | 88 kg                                                                                 | 18 kg (-0.49)                  | 23.8 kg (-0.03)                                                                                                                       | 13.7 kg (1.03)                                                                                                        | 5.6 kg (-2.98)                                                                                                                            | 47.3 kg (0.78)                         | 24.3 kg (0.51)                           | 38.5 kg (0.63)                   | ND                                                               |
| Height last exam (z)                | ND                                                                                    | 110 cm (-0.36)                 | ND                                                                                                                                    | 90 cm (1.26)                                                                                                          | 65 cm (-2.16)                                                                                                                             | 158 cm (1.05)                          | 125 cm (0.82)                            | 138.5 cm (-0.52)                 | ND                                                               |
| OFC at last exam (z)                | ND                                                                                    | 50 cm (-1.3)                   | 45.5 cm (-5.38)                                                                                                                       | 48.5 cm (-0.47)                                                                                                       | 40 cm (-4.37)                                                                                                                             | 54.3 cm (-0.02)                        | 52.5 cm (0.16)                           | 54.2 cm (0.4)                    | ND                                                               |
| Age at first signs                  | abt 3 y                                                                               | 1 y 6 m                        | 3 m                                                                                                                                   | 2 m                                                                                                                   | at birth                                                                                                                                  | 1 y 8 m                                | 5-6 m                                    | neonatal period                  | at birth (prenatal)                                              |
| First signs                         | speech delay, ID                                                                      | speech delay, poor eye contact | seizures                                                                                                                              | seizures                                                                                                              | hypotonia                                                                                                                                 | speech delay                           | feeding issues                           | feeding issues                   | IUGR, PAPP-A, postnatal SGA, pneumothorax                        |
| Motor development                   | normal                                                                                | normal                         | delayed                                                                                                                               | normal                                                                                                                | delayed                                                                                                                                   | normal                                 | normal                                   | delayed                          | delayed                                                          |
| Intellectual development            | extremely low/impaired, FSIQ 40-50                                                    | average, WPPSI-IV 90           | impaired, not formally examined due to severe developmental delay                                                                     | average                                                                                                               | impaired, not formally examined, severe developmental delay and early death                                                               | borderline mental functioning, FSIQ 77 | borderline mental functioning, FSIQ 77   | low average, TIQ 81 <sup>d</sup> | impaired, not formally examined                                  |
| Speech development                  | delayed                                                                               | delayed                        | delayed, never acquired ability to speak                                                                                              | normal                                                                                                                | ND                                                                                                                                        | delayed                                | delayed, never acquired ability to speak | delayed                          | delayed                                                          |
| Receptive language                  | ND                                                                                    | below average                  | poor                                                                                                                                  | normal                                                                                                                | ND                                                                                                                                        | below average                          | poor                                     | normal                           | poor                                                             |
| Comprehension                       | below average                                                                         | below average                  | below average                                                                                                                         | normal                                                                                                                | ND                                                                                                                                        | below average                          | below average                            | normal                           | below average                                                    |
| Neuropsychiatric signs              | none                                                                                  | none                           | ND                                                                                                                                    | none                                                                                                                  | ND                                                                                                                                        | none                                   | ASD                                      | ASD, tics                        | ASD                                                              |
| Ambulation/gait                     | normal                                                                                | normal                         | never acquired ambulation                                                                                                             | normal                                                                                                                | ND                                                                                                                                        | normal                                 | normal                                   | initially normal <sup>e</sup>    | unsteady gait                                                    |
| Neurological and muscular features  | none                                                                                  | none                           | generalized hypotonia                                                                                                                 | none                                                                                                                  | hypotonia                                                                                                                                 | none                                   | none                                     | slight hypotonia                 | hypotonia (limbs)                                                |
| Seizures/epilepsy                   | epilepsy, generalized tonic-clonic seizures, Oxcarbazepine & Levetiracetam responsive | no                             | epilepsy, frequent recurrent seizures, nonresponsive to multiple anti-epileptic drugs                                                 | epilepsy, generalized tonic-clonic seizures, frequent recurrent febrile and non-febrile seizures, no medication given | no                                                                                                                                        | no                                     | no                                       | no                               | no                                                               |
| EEG                                 | few low amplitude spike discharges on left centro-temporal area                       | normal                         | abnormal background with intermittent epileptiform discharges mainly in bifrontal regions                                             | normal                                                                                                                | normal                                                                                                                                    | ND                                     | ND                                       | normal                           | normal                                                           |
| Cerebral MRI                        | normal                                                                                | normal                         | corpus callosum absent, progressive cerebral atrophy with relative sparing of basal ganglia and cerebellum, myelination arrest at 5 m | unremarkable at 2 m, enlarged external ventricles supratentorial                                                      | hypomyelination, abnormal symmetrical central tegmental tract hyperintensities, increased DWI signal of bilateral central tegmental tract | hypoplasia of corpus callosum          | small corpus callosum (3rd centile)      | ND                               | bilateral small heterotopia in centrum semiovale                 |

**Table S1. Key clinical features of subjects with hemizygous *KCND1* variants (group 1 and group 2)**

Z-scores for birth and growth parameters were calculated using the Ped(z) Pediatric Calculator (<https://www.pedz.de/en/welcome.html>). Abbreviations: abt, about; ASD, autism spectrum disorder; DD, developmental delay; exam, examination; DWI, diffusion-weighted magnetic resonance imaging; FSIQ, full scale intelligence quotient; ID, intellectual disability; IUGR, intrauterine growth retardation; m, months; MI, maternally inherited; ND, no data; OFC, occipitofrontal head circumference; PAPP-A, pregnancy-associated plasma protein A; RN, reported normal; SD, standard deviation; SGA, small for gestational age; TIQ, total intelligence quotient; WISC, Wechsler intelligence scale for children; WNV, Wechsler nonverbal scale of ability; wks, weeks; WPPSI, Wechsler preschool and primary scale of intelligence; y, years; z, z-score. <sup>a</sup>No clear evidence of ataxia, no broad-based gait, no coordination problems, no muscle weakness or hypertonia, but rather a somewhat unstable gait pattern possibly reflecting hypermobility or a general gross motor delay, <sup>b</sup>Died at eight months due to respiratory insufficiency, probably linked to progressive hypo-myelinating encephalopathy, <sup>c</sup>Brothers of different age, <sup>d</sup>At ten years of age, decline probably due to suspected childhood disintegrative disorder, <sup>e</sup>Increasingly frequent use of a wheel chair since the onset of suspected childhood disintegrative disorder

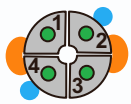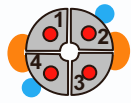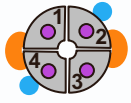

Structural homology modeling:

| <i>KCND1</i>     | side chain → side chain                                             | side chain → backbone                               | backbone → side chain                                    |
|------------------|---------------------------------------------------------------------|-----------------------------------------------------|----------------------------------------------------------|
| Thr57<br>Met57   | Thr53 (4-4-3.1Å)<br>—                                               | Trp54 (4-4-2.9Å)<br>—                               | —<br>—                                                   |
| Arg60<br>Cys60   | Asn56 (1-1-2.8Å)<br>—                                               | Gly4 (1-1-3.1Å); Asn56 (4-4-2.8Å)<br>—              | —<br>—                                                   |
| Gly80<br>Arg80   | —<br>—                                                              | —<br>—                                              | —<br>—                                                   |
| Arg92<br>Cys92   | Asp87 (1-4-2.6Å, 4-3-2.8Å); Asp89 (1-1-2.7Å, 4-4-2.6Å)<br>—         | —<br>—                                              | Asn96 (1-1-3.0Å, 4-4-3.3Å)<br>Asn96 (1-1-2.9Å, 4-4-3.3Å) |
| Arg107<br>Gln107 | Gln108 (1-3-2.9Å)<br>Arg139 (1-4-2.9Å, 3.1Å)                        | Arg107 (1-4-3.5Å, 4-3-2.7Å); Glu109 (4-3-2.9Å)<br>— | Arg107 (1-2-2.7Å)<br>Arg139 (4-4-3.3Å)                   |
| Asp115<br>Asn115 | Tyr136 (4-4-2.6Å)<br>Tyr136 (4-4-2.8Å); Lys140 (1-1-2.6Å; 4-4-3.0Å) | —<br>Asn115 (1-1-2.8Å)                              | —<br>—                                                   |
| Arg146<br>Cys146 | Glu134 (1-2-2.7Å); Asp130 (4-1-2.7Å); Glu142 (4-4-2.7Å)<br>—        | Asp130 (4-1-3.0Å)<br>—                              | Arg424 (4-4-2.9Å)<br>Arg424 (4-4-2.9Å)                   |
| Ala148<br>Thr148 | —<br>—                                                              | —<br>Ala144 (1-1-3.0Å, 4-4-2.8Å)                    | —<br>—                                                   |
| Ala202<br>Thr202 | —<br>—                                                              | —<br>Val198 (1-1-2.7Å, 4-4-2.8Å)                    | —<br>—                                                   |
| His308<br>Tyr308 | —<br>—                                                              | Tyr189 (1-1-2.8Å); His308 (1-1-3.0Å)<br>—           | —<br>—                                                   |
| Arg431<br>Cys431 | Gln428 (4-4-2.7Å)<br>—                                              | Glu126 (1-2-3.3Å)<br>—                              | —<br>—                                                   |

**Table S2. Polar contacts involving side chains in a modeled Kv4.1/KChIP2/DPP6 structure**

A computer search for polar interactions involving side chains was performed on the Kv4.1/KChIP2/DPP6 structure provided by homology modeling (see cartoons: 4  $\alpha$ -subunits, grey; 2 KChIPs, orange; 2 DPPs, blue; see also Figure S2). Amino acid substitutions were modeled and searches for polar side chain interactions including distance measurements were performed for wild-type and variant  $\alpha$ -subunits. The results obtained for the residues of interest (wild-type: green; group 1 mutants: red; group 2 mutants: purple) in  $\alpha$ -subunits 1 and 4 are illustrated. Numbers separated by dashes represent (in this order): subunit of the residue under study (1 or 4) – subunit of the interaction partner – smallest distance between interacting atoms. All three possible combinations of side chain and backbone involvement are considered. Note that in the majority of cases the amino acid substitution leads to a reduction in the number of contacts.

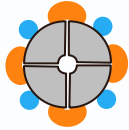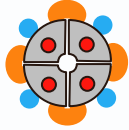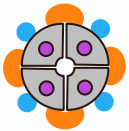

Heterologous expression:

| <b>Kv4.1<br/>+<br/>KChIP<br/>+<br/>DPP</b> | $I_{+40}$ ( $\mu$ A)       | $\tau_1$ (ms)  | $\tau_2$ (ms) | % $\tau_1$                 | $\tau_{rec}$ (ms)       | $V_{1/2,inact}$ (mV) | $k_{inact}$ (mV)         | $V_{1/2,act}$ (mV) | $k_{act}$ (mV)           |
|--------------------------------------------|----------------------------|----------------|---------------|----------------------------|-------------------------|----------------------|--------------------------|--------------------|--------------------------|
| WT                                         | 19.2 ± 9.5<br>(n = 16)     | 30.7 ± 4.7     | 85.8 ± 56.8   | 82.6 ± 10.8<br>(n = 21)    | 11.2 ± 2.0<br>(n = 16)  | -57.9 ± 4.3          | 7.42 ± 2.00<br>(n = 18)  | -6.5 ± 5.4         | 25.2 ± 2.2<br>(n = 17)   |
| p.Thr57Met                                 | 17.6 ± 13.6<br>(n = 9)     | 26.8 ± 2.5     | 107 ± 36      | 93.6 ± 3.8<br>(n = 9)      | 10.6 ± 1.0<br>(n = 9)   | -57.0 ± 2.8          | 7.32 ± 1.40<br>(n = 9)   | -2.5 ± 2.7         | 24.2 ± 1.4<br>(n = 9)    |
| p.Arg60Cys                                 | 23.2 ± 13.3<br>(n = 14)    | 27.1 ± 5.2     | 102 ± 49      | 91.7 ± 5.9<br>(n = 14)     | 9.80 ± 0.45<br>(n = 10) | -56.2 ± 2.5          | 7.31 ± 0.96<br>(n = 9)   | -1.1 ± 3.6         | 28.5 ± 2.3<br>(n = 9)    |
| p.Gly80Arg                                 | 15.8 ± 6.6<br>(n = 10)     | 25.4 ± 3.5     | 55.4 ± 22.1   | 76.2 ± 15.7<br>(n = 10)    | 9.74 ± 1.43<br>(n = 8)  | -60.0 ± 3.0          | 7.23 ± 2.10<br>(n = 9)   | -9.9 ± 3.4         | 24.7 ± 2.8<br>(n = 10)   |
| pArg92Cys                                  | 5.47 ± 3.63 **<br>(n = 21) | 36.3 ± 4.3 *   | 150 ± 83 *    | 83.3 ± 15.2<br>(n = 20)    | 12.2 ± 1.4<br>(n = 19)  | -57.2 ± 2.5          | 6.49 ± 0.88<br>(n = 16)  | -6.0 ± 5.3         | 21.5 ± 1.8 *<br>(n = 12) |
| p.Arg107Gln                                | 22.4 ± 7.7<br>(n = 13)     | 21.2 ± 2.4 **  | 54.5 ± 18.7   | 82.8 ± 16.6<br>(n = 13)    | 10.1 ± 3.3<br>(n = 8)   | -57.1 ± 3.0          | 6.87 ± 1.53<br>(n = 9)   | -4.8 ± 3.6         | 26.3 ± 1.9<br>(n = 8)    |
| p.Asp115Asn                                | 9.22 ± 4.36 *<br>(n = 11)  | 18.4 ± 2.8 **  | 35.8 ± 5.5 *  | 70.1 ± 17.4<br>(n = 11)    | 11.3 ± 2.5<br>(n = 8)   | -61.7 ± 2.3          | 6.32 ± 0.42<br>(n = 8)   | -6.8 ± 2.4         | 24.3 ± 2.6<br>(n = 8)    |
| p.Arg146Cys                                | 4.22 ± 1.62 *<br>(n = 10)  | 21.0 ± 2.4 **  | 40.9 ± 8.1    | 65.4 ± 13.6 *<br>(n = 10)  | 11.5 ± 1.6<br>(n = 8)   | -61.8 ± 2.3          | 8.48 ± 0.76<br>(n = 6)   | -0.5 ± 7.6         | 24.2 ± 3.7<br>(n = 7)    |
| p.Ala148Thr                                | 12.5 ± 3.1<br>(n = 10)     | 26.0 ± 2.3     | 47.1 ± 6.0    | 63.7 ± 10.8 *<br>(n = 10)  | 12.4 ± 1.4<br>(n = 8)   | -61.2 ± 4.2          | 7.14 ± 0.60<br>(n = 8)   | -8.2 ± 4.8         | 24.5 ± 2.5<br>(n = 8)    |
| p.Ala202Thr                                | 20.8 ± 12.2<br>(n = 13)    | 33.5 ± 5.8     | 82.0 ± 19.3   | 81.0 ± 12.0<br>(n = 13)    | 11.0 ± 1.5<br>(n = 9)   | -53.3 ± 5.3 *        | 10.7 ± 3.6 **<br>(n = 9) | +3.1 ± 6.2 *       | 27.6 ± 2.7<br>(n = 10)   |
| p.His308Tyr                                | 2.30 ± 1.95 **<br>(n = 12) | 57.0 ± 13.1 ** | 116 ± 35      | 41.2 ± 27.9 **<br>(n = 12) | 937 ± 293 **<br>(n = 9) | -98.6 ± 6.5 **       | 7.79 ± 2.80<br>(n = 9)   | -22.9 ± 17.2 **    | 33.2 ± 8.4 **<br>(n = 9) |
| p.Arg431Cys                                | 18.2 ± 9.8<br>(n = 10)     | 29.6 ± 2.4     | 75.8 ± 14.9   | 83.2 ± 10.0<br>(n = 9)     | 11.5 ± 1.4<br>(n = 9)   | -59.7 ± 5.2          | 6.85 ± 1.03<br>(n = 8)   | -7.7 ± 5.6         | 25.7 ± 2.9<br>(n = 9)    |
| p.Lys450*                                  | 1.20 ± 0.75 **<br>(n = 12) | 35.8 ± 5.7 *   | 156 ± 30 **   | 60.8 ± 7.6 **<br>(n = 15)  | 38.7 ± 4.5<br>(n = 9)   | -67.7 ± 3.1 **       | 7.17 ± 1.24<br>(n = 7)   | -10.7 ± 6.9        | 24.4 ± 3.8<br>(n = 7)    |
| p.Thr516Ser                                | 19.1 ± 8.2<br>(n = 15)     | 46.1 ± 4.3 **  | 146 ± 17 *    | 72.8 ± 3.7<br>(n = 14)     | 18.7 ± 2.5<br>(n = 13)  | -46.0 ± 2.0 **       | 6.70 ± 1.16<br>(n = 11)  | +4.4 ± 5.3 *       | 23.1 ± 3.1<br>(n = 12)   |
| p.Arg536Gly                                | 17.6 ± 9.6<br>(n = 12)     | 32.1 ± 4.0     | 88.4 ± 45.5   | 86.0 ± 10.6<br>(n = 12)    | 10.7 ± 1.3<br>(n = 9)   | -59.2 ± 2.9          | 7.24 ± 1.18<br>(n = 9)   | -11.6 ± 3.2        | 25.1 ± 0.9<br>(n = 9)    |
| p.Asn578Ile                                | 21.9 ± 9.8<br>(n = 12)     | 38.5 ± 5.1 *   | 125 ± 78      | 88.5 ± 11.0<br>(n = 12)    | 11.7 ± 2.4<br>(n = 9)   | -58.6 ± 2.7          | 8.62 ± 2.87<br>(n = 8)   | -14.6 ± 4.3        | 27.5 ± 2.1<br>(n = 7)    |

**Table S3. Biophysical parameters for Kv4.1 wild-type and variant ternary channels**

Kv4.1 channels (grey, variant channels with red or purple dots) were studied in a ternary configuration; i.e. in the presence of both KChIP (orange) and DPP (blue). Mean values ± SD and number of observations (n) are given for the peak current amplitude at + 40 mV ( $I_{+40}$ ), the time constants of macroscopic inactivation ( $\tau_1$  and  $\tau_2$ ) including the fractional amplitude of  $\tau_1$  (%), the time constant of recovery from inactivation ( $\tau_{rec}$ ) and the voltages of halfmaximal inactivation ( $V_{1/2,inact}$ ) and activation ( $V_{1/2,act}$ ) with corresponding slope factors ( $k_{inact}$  and  $k_{act}$ , respectively). Statistics are based on one-way analysis of variance (ANOVA) with Dunnett's post hoc testing. For significant variant effects (i.e., deviations from Kv4.1 WT ternary; key variants: red, maternally inherited missense variants: purple) significance levels are indicated with \* ( $p < 0.05$ ) or \*\* ( $p < 0.0001$ ); shaded fields: no significant differences found compared to Kv4.1 WT ternary.

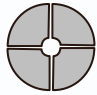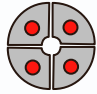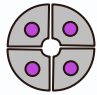

Heterologous expression:

| <b>Kv4.1</b> | $I_{+40}$ ( $\mu$ A)       | $\tau_1$ (ms)  | $\tau_2$ (ms) | % $\tau_1$               | $\tau_{rec}$ (ms)          | $V_{1/2,inact}$ (mV) | $k_{inact}$ (mV)          | $V_{1/2,act}$ (mV) | $k_{act}$ (mV)           |
|--------------|----------------------------|----------------|---------------|--------------------------|----------------------------|----------------------|---------------------------|--------------------|--------------------------|
| WT           | 3.94 ± 2.24<br>(n = 46)    | 52.1 ± 9.3     | 452 ± 67      | 67.3 ± 5.6<br>(n = 45)   | 143 ± 50<br>(n = 22)       | -65.6 ± 2.3          | 7.10 ± 1.71<br>(n = 24)   | -4.3 ± 4.7         | 22.3 ± 2.1<br>(n = 25)   |
| p.Thr57Met   | 4.25 ± 2.02<br>(n = 13)    | 46.9 ± 6.0     | 382 ± 29 *    | 72.3 ± 1.7 *<br>(n = 13) | 85.3 ± 14.2<br>(n = 8)     | -61.5 ± 2.0 *        | 7.72 ± 1.53<br>(n = 8)    | +2.1 ± 4.5 *       | 21.5 ± 2.8<br>(n = 7)    |
| p.Arg60Cys   | 4.91 ± 2.26<br>(n = 17)    | 52.5 ± 6.5     | 487 ± 65      | 67.8 ± 5.3<br>(n = 16)   | 137 ± 18<br>(n = 8)        | -65.4 ± 0.9          | 7.60 ± 2.05<br>(n = 9)    | -2.4 ± 1.9         | 23.7 ± 0.7<br>(n = 6)    |
| p.Gly80Arg   | 6.29 ± 2.90 *<br>(n = 16)  | 55.4 ± 5.6     | 528 ± 51 *    | 64.6 ± 3.6<br>(n = 20)   | 117 ± 13<br>(n = 9)        | -64.9 ± 1.2          | 9.04 ± 2.72 *<br>(n = 10) | -4.0 ± 1.8         | 24.1 ± 0.7<br>(n = 4)    |
| p.Arg92Cys   | 2.20 ± 1.28 *<br>(n = 26)  | 38.7 ± 1.8 **  | 467 ± 45      | 72.9 ± 1.3 *<br>(n = 17) | 114 ± 13<br>(n = 11)       | -58.3 ± 2.8 **       | 6.11 ± 0.35<br>(n = 10)   | +3.6 ± 5.1 *       | 22.0 ± 2.0<br>(n = 11)   |
| p.Arg107Gln  | 3.80 ± 2.56<br>(n = 66)    | 56.4 ± 9.7     | 424 ± 64      | 67.4 ± 5.1<br>(n = 39)   | 144 ± 27<br>(n = 11)       | -64.5 ± 2.3          | 8.65 ± 1.72<br>(n = 16)   | +0.4 ± 5.1         | 23.9 ± 2.9<br>(n = 13)   |
| p.Asp115Asn  | 3.86 ± 2.95<br>(n = 33)    | 60.5 ± 10.1 ** | 469 ± 85      | 68.5 ± 5.2<br>(n = 31)   | 188 ± 47<br>(n = 5)        | -70.9 ± 1.3 **       | 9.85 ± 1.52 *<br>(n = 8)  | -13.9 ± 7.9 *      | 20.8 ± 4.2<br>(n = 4)    |
| p.Arg146Cys  | 4.46 ± 0.92<br>(n = 12)    | 60.0 ± 6.9 *   | 573 ± 81 **   | 72.4 ± 3.7 *<br>(n = 20) | 155 ± 33<br>(n = 9)        | -64.9 ± 1.3          | 10.7 ± 3.0 **<br>(n = 9)  | +2.3 ± 2.6         | 26.5 ± 2.4 *<br>(n = 5)  |
| p.Ala148Thr  | 3.70 ± 1.53<br>(n = 19)    | 64.2 ± 7.7 **  | 546 ± 57 **   | 69.0 ± 4.4<br>(n = 19)   | 231 ± 19<br>(n = 8)        | -69.2 ± 1.0 *        | 6.85 ± 0.33<br>(n = 8)    | -4.5 ± 4.0         | 23.3 ± 1.8<br>(n = 10)   |
| p.Ala202Thr  | 10.7 ± 2.72 **<br>(n = 12) | 40.3 ± 5.3 **  | 361 ± 35 *    | 73.8 ± 2.7 *<br>(n = 12) | 81.9 ± 9.8<br>(n = 7)      | -59.8 ± 2.6 **       | 6.77 ± 0.83<br>(n = 9)    | -1.1 ± 4.3         | 21.2 ± 1.1<br>(n = 9)    |
| p.His308Tyr  | 0.66 ± 0.28 **<br>(n = 12) | 47.9 ± 5.9     | 385 ± 51 *    | 65.6 ± 4.7<br>(n = 12)   | 3760 ± 1650 **<br>(n = 10) | -100.6 ± 5.7 **      | 7.16 ± 2.32<br>(n = 8)    | -14.2 ± 10.6 *     | 24.8 ± 5.3<br>(n = 7)    |
| p.Arg431Cys  | 1.98 ± 1.23 *<br>(n = 16)  | 50.3 ± 8.0     | 492 ± 56      | 67.7 ± 3.9<br>(n = 25)   | 132 ± 27<br>(n = 9)        | -68.6 ± 3.8 *        | 9.21 ± 1.76 *<br>(n = 8)  | -9.8 ± 7.4         | 22.7 ± 2.3<br>(n = 4)    |
| p.Lys450*    | 0.36 ± 0.17 **<br>(n = 19) | 71.9 ± 6.5 **  | 354 ± 123 **  | 73.9 ± 6.0 *<br>(n = 12) | 106 ± 7<br>(n = 5)         | -64.1 ± 1.8          | 9.43 ± 0.62<br>(n = 4)    | +30.7 ± 4.8 **     | 34.1 ± 4.0 **<br>(n = 5) |
| p.Thr516Ser  | 13.3 ± 3.07 **<br>(n = 20) | 48.8 ± 3.9     | 464 ± 20      | 68.7 ± 1.8<br>(n = 20)   | 115 ± 8<br>(n = 6)         | -61.7 ± 1.9 *        | 7.18 ± 0.28<br>(n = 5)    | -0.3 ± 1.9         | 22.4 ± 0.8<br>(n = 5)    |
| p.Arg536Gly  | 5.17 ± 1.33<br>(n = 15)    | 64.8 ± 7.8 **  | 460 ± 73      | 64.5 ± 4.3<br>(n = 22)   | 153 ± 16<br>(n = 10)       | -66.7 ± 2.3          | 8.29 ± 1.12<br>(n = 12)   | -1.7 ± 1.9         | 23.2 ± 2.2<br>(n = 8)    |
| p.Asn578Ile  | 7.39 ± 2.08 *<br>(n = 5)   | 70.8 ± 3.3 **  | 591 ± 26 *    | 60.6 ± 1.3 *<br>(n = 5)  | 219 ± 25<br>(n = 5)        | -69.4 ± 1.4 *        | 8.01 ± 0.90<br>(n = 4)    | -4.1 ± 2.9         | 24.5 ± 0.5<br>(n = 4)    |

**Table S4. Biophysical parameters for Kv4.1 wild-type and variant homotetrameric channels**

Kv4.1 channels (grey, variant channels with red or purple dots) were expressed in the absence of auxiliary  $\beta$ -subunits. Mean values  $\pm$  SD and number of observations (n) are given for the peak current amplitude at + 40 mV ( $I_{+40}$ ), the time constants of macroscopic inactivation ( $\tau_1$  and  $\tau_2$ ) including the fractional amplitude of  $\tau_1$  (%), the time constant of recovery from inactivation ( $\tau_{rec}$ ) and the voltages of halfmaximal inactivation ( $V_{1/2,inact}$ ) and activation ( $V_{1/2,act}$ ) with corresponding slope factors ( $k_{inact}$  and  $k_{act}$ , respectively); Statistics are based on one-way analysis of variance (ANOVA) with Dunnett's post hoc testing. For significant variant effects (i.e., deviations from Kv4.1 WT; key variants: red, maternally inherited missense variants: purple) significance levels are indicated with \* ( $p < 0.05$ ) or \*\* ( $p < 0.0001$ ); shaded fields: no significant differences found compared to Kv4.1 WT.

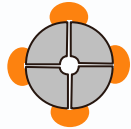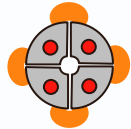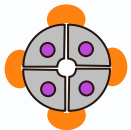

Heterologous expression:

| Kv4.1 + KCHIP | $I_{+40}$ ( $\mu$ A)          | $\tau_1$ (ms)     | $\tau_2$ (ms)     | % $\tau_1$                     | $\tau_{rec}$ (ms)             | $V_{1/2,inact}$ (mV) | $k_{inact}$ (mV)              | $V_{1/2,act}$ (mV)  | $k_{act}$ (mV)                |
|---------------|-------------------------------|-------------------|-------------------|--------------------------------|-------------------------------|----------------------|-------------------------------|---------------------|-------------------------------|
| WT            | 21.7 $\pm$ 6.0<br>(n = 7)     | 73.9 $\pm$ 8.1    | 176 $\pm$ 64      | 90.5 $\pm$ 6.6<br>(n = 6)      | 14.9 $\pm$ 3.5<br>(n = 5)     | -48.0 $\pm$ 4.2      | 5.47 $\pm$ 1.28<br>(n = 5)    | -7.0 $\pm$ 3.2      | 25.1 $\pm$ 2.1<br>(n = 6)     |
| p.Thr57Met    | 24.4 $\pm$ 7.2<br>(n = 6)     | 52.1 $\pm$ 10.7 * | 93.8 $\pm$ 19.4 * | 55.8 $\pm$ 13.6 **<br>(n = 13) | 20.4 $\pm$ 6.3<br>(n = 7)     | -50.3 $\pm$ 2.0      | 5.82 $\pm$ 0.61<br>(n = 7)    | -1.9 $\pm$ 3.4      | 20.8 $\pm$ 1.8<br>(n = 10)    |
| p.Arg60Cys    | 23.3 $\pm$ 5.2<br>(n = 8)     | 74.7 $\pm$ 11.2   | 243 $\pm$ 93      | 93.2 $\pm$ 4.6<br>(n = 7)      | 11.0 $\pm$ 2.7<br>(n = 4)     | -44.2 $\pm$ 1.6      | 6.76 $\pm$ 1.51<br>(n = 5)    | -2.4 $\pm$ 2.8      | 26.9 $\pm$ 2.0<br>(n = 4)     |
| p.Gly80Arg    | 15.7 $\pm$ 4.7<br>(n = 6)     | 59.3 $\pm$ 8.8    | 109 $\pm$ 15      | 49.6 $\pm$ 8.1 **<br>(n = 6)   | 23.1 $\pm$ 1.6<br>(n = 5)     | -55.0 $\pm$ 3.2 *    | 4.44 $\pm$ 0.28<br>(n = 5)    | -11.3 $\pm$ 2.8     | 20.1 $\pm$ 1.0<br>(n = 4)     |
| p.Arg92Cys    | 3.50 $\pm$ 3.30 *<br>(n = 11) | 45.2 $\pm$ 4.8 ** | 110 $\pm$ 37 *    | 66.0 $\pm$ 16.1 *<br>(n = 10)  | 27.3 $\pm$ 2.7<br>(n = 9)     | -45.8 $\pm$ 2.6      | 6.69 $\pm$ 0.93<br>(n = 8)    | +11.1 $\pm$ 10.0 ** | 24.7 $\pm$ 3.5<br>(n = 7)     |
| p.Arg107Gln   | 29.0 $\pm$ 14.7<br>(n = 6)    | 59.1 $\pm$ 9.5    | 113 $\pm$ 26      | 79.4 $\pm$ 12.5<br>(n = 6)     | 13.9 $\pm$ 4.9<br>(n = 5)     | -50.6 $\pm$ 1.7      | 4.94 $\pm$ 0.77<br>(n = 5)    | -6.1 $\pm$ 1.3      | 24.5 $\pm$ 1.9<br>(n = 5)     |
| p.Asp115Asn   | 11.6 $\pm$ 8.3<br>(n = 6)     | 55.5 $\pm$ 6.8 *  | 104 $\pm$ 12 *    | 69.0 $\pm$ 16.8<br>(n = 6)     | 23.0 $\pm$ 4.2<br>(n = 5)     | -49.3 $\pm$ 2.8      | 8.32 $\pm$ 2.70 *<br>(n = 6)  | +3.1 $\pm$ 9.4 *    | 24.4 $\pm$ 4.1<br>(n = 6)     |
| p.Arg146Cys   | 4.63 $\pm$ 2.32 *<br>(n = 6)  | 45.7 $\pm$ 6.1 ** | 87.6 $\pm$ 7.3 *  | 39.2 $\pm$ 11.2 **<br>(n = 6)  | 24.3 $\pm$ 2.9<br>(n = 5)     | -52.4 $\pm$ 1.3      | 6.48 $\pm$ 1.07<br>(n = 4)    | -1.3 $\pm$ 2.4      | 21.3 $\pm$ 2.2<br>(n = 4)     |
| p.Ala148Thr   | 17.5 $\pm$ 9.4<br>(n = 6)     | 70.3 $\pm$ 13.9   | 143 $\pm$ 44      | 77.1 $\pm$ 25.1<br>(n = 6)     | 19.4 $\pm$ 8.5<br>(n = 5)     | -50.2 $\pm$ 4.1      | 4.59 $\pm$ 0.31<br>(n = 5)    | -6.8 $\pm$ 6.2      | 21.0 $\pm$ 4.3<br>(n = 5)     |
| p.Ala202Thr   | 57.9 $\pm$ 27.2 **<br>(n = 6) | 54.7 $\pm$ 12.7 * | 118 $\pm$ 49      | 66.9 $\pm$ 19.2 *<br>(n = 9)   | 16.0 $\pm$ 2.9<br>(n = 8)     | -48.4 $\pm$ 3.6      | 4.43 $\pm$ 0.42<br>(n = 8)    | -1.9 $\pm$ 2.3      | 21.5 $\pm$ 2.0<br>(n = 9)     |
| p.His308Tyr   | 12.5 $\pm$ 4.9<br>(n = 11)    | 70.8 $\pm$ 13.0   | 124 $\pm$ 16      | 41.4 $\pm$ 20.4 **<br>(n = 25) | 1520 $\pm$ 540 **<br>(n = 11) | -88.3 $\pm$ 6.8 **   | 6.28 $\pm$ 3.34<br>(n = 9)    | -30.5 $\pm$ 8.8 **  | 30.7 $\pm$ 7.7 *<br>(n = 13)  |
| p.Arg431Cys   | 43.3 $\pm$ 19.2 *<br>(n = 8)  | 54.1 $\pm$ 8.6 *  | 124 $\pm$ 49      | 82.5 $\pm$ 18.4<br>(n = 8)     | 13.5 $\pm$ 1.5<br>(n = 5)     | -47.2 $\pm$ 4.2      | 5.65 $\pm$ 0.85<br>(n = 5)    | -1.8 $\pm$ 4.3      | 22.3 $\pm$ 0.7<br>(n = 3)     |
| p.Lys450*     | 0.62 $\pm$ 0.27 *<br>(n = 19) | 81.9 $\pm$ 11.2   | 290 $\pm$ 37 **   | 70.1 $\pm$ 4.2 *<br>(n = 20)   | 89.1 $\pm$ 17.2<br>(n = 10)   | -60.4 $\pm$ 3.7 **   | 8.64 $\pm$ 1.42 *<br>(n = 10) | +20.8 $\pm$ 6.9 **  | 36.6 $\pm$ 4.2 **<br>(n = 11) |
| p.Thr516Ser   | 38.5 $\pm$ 14.3 *<br>(n = 13) | 54.6 $\pm$ 5.6 *  | 202 $\pm$ 27      | 72.0 $\pm$ 2.6<br>(n = 13)     | 33.0 $\pm$ 6.7<br>(n = 8)     | -49.7 $\pm$ 2.2      | 5.28 $\pm$ 0.56<br>(n = 5)    | -5.5 $\pm$ 2.4      | 19.4 $\pm$ 1.7<br>(n = 5)     |
| p.Arg536Gly   | 17.7 $\pm$ 9.5<br>(n = 6)     | 42.2 $\pm$ 5.4 ** | 72.1 $\pm$ 8.1 *  | 65.0 $\pm$ 16.5 *<br>(n = 6)   | 13.7 $\pm$ 1.1<br>(n = 4)     | -45.8 $\pm$ 0.6      | 5.37 $\pm$ 0.90<br>(n = 4)    | +2.7 $\pm$ 1.7      | 21.2 $\pm$ 1.7<br>(n = 4)     |
| p.Asn578Ile   | 24.4 $\pm$ 11.9<br>(n = 6)    | 62.6 $\pm$ 7.3    | 194 $\pm$ 117     | 87.4 $\pm$ 13.7<br>(n = 6)     | 20.6 $\pm$ 3.3<br>(n = 4)     | -48.6 $\pm$ 3.9      | 6.68 $\pm$ 2.48<br>(n = 4)    | -1.4 $\pm$ 2.6      | 24.5 $\pm$ 1.2<br>(n = 5)     |

**Table S5. Biophysical parameters for Kv4.1 wild-type and variant binary channels with KCHIP**

Kv4.1 channels (grey, variant channels with red or purple dots) were studied in the presence of KCHIP (orange). Mean values  $\pm$  SD and number of observations (n) are given for the peak current amplitude at +40 mV ( $I_{+40}$ ), the time constants of macroscopic inactivation ( $\tau_1$  and  $\tau_2$ ) including the fractional amplitude of  $\tau_1$  (%), the time constant of recovery from inactivation ( $\tau_{rec}$ ) and the voltages of halfmaximal inactivation ( $V_{1/2,inact}$ ) and activation ( $V_{1/2,act}$ ) with corresponding slope factors ( $k_{inact}$  and  $k_{act}$ , respectively); Statistics are based on one-way analysis of variance (ANOVA) with Dunnett's post hoc testing. For significant variant effects (i.e., deviations from Kv4.1 WT + KCHIP; key variants: red, maternally inherited missense variants: purple) significance levels are indicated with \* ( $p < 0.05$ ) or \*\* ( $p < 0.0001$ ); shaded fields: no significant differences found compared to Kv4.1 WT + KCHIP.

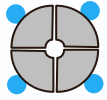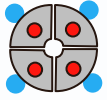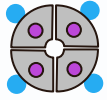

Heterologous expression:

| Kv4.1 + DPP | $I_{+40}$ ( $\mu A$ )      | $\tau_1$ (ms)  | $\tau_2$ (ms) | % $\tau_1$                | $\tau_{rec}$ (ms)         | $V_{1/2,inact}$ (mV) | $k_{inact}$ (mV)        | $V_{1/2,act}$ (mV) | $k_{act}$ (mV)         |
|-------------|----------------------------|----------------|---------------|---------------------------|---------------------------|----------------------|-------------------------|--------------------|------------------------|
| WT          | 62.8 ± 23.3<br>(n = 5)     | 26.3 ± 3.8     | 289 ± 59      | 71.7 ± 2.7<br>(n = 11)    | 29.7 ± 8.4<br>(n = 5)     | -71.9 ± 3.9          | 8.46 ± 2.63<br>(n = 4)  | -22.4 ± 4.8        | 24.7 ± 4.6<br>(n = 5)  |
| p.Thr57Met  | 44.6 ± 11.2<br>(n = 6)     | 35.8 ± 2.9 **  | 279 ± 27      | 67.1 ± 2.5 *<br>(n = 13)  | 45.8 ± 11.6<br>(n = 7)    | -74.8 ± 1.2          | 7.03 ± 0.76<br>(n = 7)  | -23.2 ± 3.3        | 21.9 ± 2.7<br>(n = 9)  |
| p.Arg60Cys  | 70.9 ± 20.3<br>(n = 6)     | 21.5 ± 1.9     | 305 ± 15      | 75.8 ± 1.8 *<br>(n = 11)  | 34.1 ± 3.3<br>(n = 4)     | -73.4 ± 3.3          | 6.17 ± 0.77<br>(n = 5)  | -24.2 ± 6.0        | 19.8 ± 5.9<br>(n = 6)  |
| p.Gly80Arg  | 57.1 ± 17.9<br>(n = 6)     | 19.2 ± 2.0 *   | 322 ± 20      | 74.2 ± 3.0<br>(n = 11)    | 27.9 ± 6.4<br>(n = 5)     | -73.8 ± 1.8          | 5.43 ± 0.66<br>(n = 5)  | -28.9 ± 3.5        | 19.2 ± 3.6<br>(n = 5)  |
| p.Arg92Cys  | 9.23 ± 3.65 **<br>(n = 13) | 33.0 ± 4.2 *   | 330 ± 43      | 68.9 ± 3.3<br>(n = 12)    | 39.1 ± 4.8<br>(n = 9)     | -67.3 ± 4.1          | 9.41 ± 1.79<br>(n = 9)  | -1.5 ± 14.2 *      | 27.7 ± 4.4<br>(n = 8)  |
| p.Arg107Gln | 60.7 ± 26.6<br>(n = 6)     | 24.2 ± 4.6     | 252 ± 33      | 76.8 ± 3.1 **<br>(n = 18) | 19.8 ± 1.9<br>(n = 4)     | -57.9 ± 8.6 **       | 12.1 ± 2.9 *<br>(n = 4) | -15.8 ± 7.7        | 25.3 ± 4.7<br>(n = 7)  |
| p.Asp115Asn | 48.2 ± 17.5<br>(n = 6)     | 23.4 ± 2.8     | 350 ± 12 *    | 77.2 ± 2.1 **<br>(n = 10) | 28.3 ± 3.8<br>(n = 4)     | -72.8 ± 4.3          | 10.0 ± 2.0<br>(n = 4)   | -17.5 ± 12.6       | 27.7 ± 5.1<br>(n = 4)  |
| p.Arg146Cys | 18.2 ± 2.0 **<br>(n = 6)   | 17.9 ± 2.1 *   | 359 ± 41 **   | 85.9 ± 1.0 **<br>(n = 10) | 26.1 ± 4.2<br>(n = 4)     | -73.8 ± 1.3          | 7.45 ± 0.43<br>(n = 4)  | -24.7 ± 4.6        | 18.1 ± 3.7<br>(n = 6)  |
| p.Ala148Thr | 38.5 ± 12.2 *<br>(n = 6)   | 24.1 ± 3.9     | 372 ± 41 **   | 80.6 ± 3.0 **<br>(n = 10) | 24.6 ± 4.9<br>(n = 4)     | -73.2 ± 3.4          | 7.68 ± 0.14<br>(n = 4)  | -24.4 ± 5.4        | 20.3 ± 5.2<br>(n = 6)  |
| p.Ala202Thr | 48.8 ± 8.6<br>(n = 6)      | 35.7 ± 5.3 **  | 313 ± 28      | 69.3 ± 2.2<br>(n = 16)    | 48.6 ± 6.6<br>(n = 8)     | -72.9 ± 1.3          | 8.03 ± 0.50<br>(n = 8)  | -17.9 ± 4.2        | 20.8 ± 3.2<br>(n = 10) |
| p.His308Tyr | 0.82 ± 0.40 **<br>(n = 14) | 47.6 ± 3.0 **  | 317 ± 50      | 64.5 ± 3.5 **<br>(n = 14) | 2420 ± 1350 **<br>(n = 8) | -110.3 ± 6.5 **      | 6.74 ± 3.56<br>(n = 8)  | -17.2 ± 14.3       | 30.0 ± 8.0<br>(n = 10) |
| p.Arg431Cys | 65.7 ± 19.9<br>(n = 6)     | 17.8 ± 1.2 *   | 283 ± 32      | 81.4 ± 1.8 **<br>(n = 11) | 20.6 ± 1.8<br>(n = 4)     | -71.5 ± 2.0          | 7.68 ± 1.45<br>(n = 4)  | -24.3 ± 5.3        | 20.6 ± 5.8<br>(n = 6)  |
| p.Lys450*   | 1.27 ± 0.54 **<br>(n = 10) | 41.9 ± 12.1 ** | 279 ± 36      | 71.6 ± 3.6<br>(n = 14)    | 75.7 ± 5.4<br>(n = 7)     | -80.2 ± 2.5 *        | 7.97 ± 1.06<br>(n = 7)  | -23.7 ± 7.5        | 25.6 ± 4.3<br>(n = 8)  |
| p.Thr516Ser | 47.8 ± 13.6<br>(n = 11)    | 33.9 ± 3.8 *   | 320 ± 23      | 67.4 ± 2.4 *<br>(n = 11)  | 50.8 ± 6.4<br>(n = 6)     | -70.2 ± 2.6          | 6.38 ± 0.23<br>(n = 8)  | -16.6 ± 2.6        | 22.0 ± 2.0<br>(n = 7)  |
| p.Arg536Gly | 52.5 ± 10.1<br>(n = 4)     | 16.6 ± 1.8 *   | 272 ± 23      | 82.2 ± 1.8 **<br>(n = 9)  | 17.7 ± 1.9<br>(n = 4)     | -70.0 ± 1.2          | 5.58 ± 0.52<br>(n = 4)  | -25.7 ± 2.8        | 17.8 ± 1.5<br>(n = 4)  |
| p.Asn578Ile | 46.1 ± 6.0<br>(n = 4)      | 23.0 ± 3.8     | 332 ± 21 *    | 74.7 ± 2.8<br>(n = 10)    | 48.0 ± 8.3<br>(n = 3)     | -78.1 ± 1.8          | 6.36 ± 0.76<br>(n = 4)  | -31.7 ± 3.9        | 18.6 ± 5.3<br>(n = 5)  |

**Table S6. Biophysical parameters for Kv4.1 wild-type and variant binary channels with DPP**

Kv4.1 channels (grey, variant channels with red or purple dots) were studied in the presence of DPP (blue). Mean values ± SD and number of observations (n) are given for the peak current amplitude at +40 mV ( $I_{+40}$ ), the time constants of macroscopic inactivation ( $\tau_1$  and  $\tau_2$ ) including the fractional amplitude of  $\tau_1$  (%), the time constant of recovery from inactivation ( $\tau_{rec}$ ) and the voltages of halfmaximal inactivation ( $V_{1/2,inact}$ ) and activation ( $V_{1/2,act}$ ) with corresponding slope factors ( $k_{inact}$  and  $k_{act}$ , respectively); Statistics are based on one-way analysis of variance (ANOVA) with Dunnett's post hoc testing. For significant variant effects (i.e., deviations from Kv4.1 WT + DPP; key variants: red, maternally inherited missense variants: purple) significance levels are indicated with \* ( $p < 0.05$ ) or \*\* ( $p < 0.0001$ ).

|                                                      |                                | Kv4.1 functional analysis |   |   |   |       |       |                          |   |   |   |       |       |                            |   |   |   |       |       |                                                 |   |   |   |       |       |                                  |   |   |   |       |       |           |    |
|------------------------------------------------------|--------------------------------|---------------------------|---|---|---|-------|-------|--------------------------|---|---|---|-------|-------|----------------------------|---|---|---|-------|-------|-------------------------------------------------|---|---|---|-------|-------|----------------------------------|---|---|---|-------|-------|-----------|----|
|                                                      |                                | peak current amplitude    |   |   |   |       |       | macroscopic inactivation |   |   |   |       |       | recovery from inactivation |   |   |   |       |       | voltage dependence of steady-state inactivation |   |   |   |       |       | voltage dependence of activation |   |   |   |       |       |           |    |
| Individual #                                         |                                | t                         | a | K | D | = ± K | = ± D | t                        | a | K | D | = ± K | = ± D | t                          | a | K | D | = ± K | = ± D | t                                               | a | K | D | = ± K | = ± D | t                                | a | K | D | = ± K | = ± D | PS3 score |    |
| <b>DNVs</b>                                          |                                |                           |   |   |   |       |       |                          |   |   |   |       |       |                            |   |   |   |       |       |                                                 |   |   |   |       |       |                                  |   |   |   |       |       |           |    |
| 1                                                    | c.274C>T (p.Arg92Cys)          | Y                         | Y | Y | Y | Y     | N     | Y                        | Y | Y | Y | N     | N     | N                          | N | N | N | N     | N     | N                                               | N | N | N | N     | N     | N                                | N | N | N | 15    |       |           |    |
| 2                                                    | c.343G>A (p.Asp115Asn)         | Y                         | N | N | N | Y     | N     | Y                        | Y | Y | Y | N     | N     | N                          | N | N | N | N     | N     | N                                               | N | N | N | N     | N     | N                                | N | N | N | 12    |       |           |    |
| <b>PTVs</b>                                          |                                |                           |   |   |   |       |       |                          |   |   |   |       |       |                            |   |   |   |       |       |                                                 |   |   |   |       |       |                                  |   |   |   |       |       |           |    |
| 3                                                    | c.182_194del (p.Tyr61Cysfs*31) | complete LOF              |   |   |   |       |       |                          |   |   |   |       |       |                            |   |   |   |       |       |                                                 |   |   |   |       |       |                                  |   |   |   |       |       |           |    |
| 4                                                    | c.295C>T (p.Arg99*)            | complete LOF              |   |   |   |       |       |                          |   |   |   |       |       |                            |   |   |   |       |       |                                                 |   |   |   |       |       |                                  |   |   |   |       |       |           |    |
| 5                                                    | c.1348A>T (p.Lys450*)          | Y                         | Y | Y | Y | N     | N     | Y                        | Y | Y | Y | N     | N     | N                          | N | N | N | N     | N     | Y                                               | N | Y | N | Y     | Y     | Y                                | N | N | Y | Y     | N     | N         | 15 |
| <b>maternally inherited missense variants</b>        |                                |                           |   |   |   |       |       |                          |   |   |   |       |       |                            |   |   |   |       |       |                                                 |   |   |   |       |       |                                  |   |   |   |       |       |           |    |
| variants affecting the N-terminal cytoplasmic domain |                                |                           |   |   |   |       |       |                          |   |   |   |       |       |                            |   |   |   |       |       |                                                 |   |   |   |       |       |                                  |   |   |   |       |       |           |    |
| 6                                                    | c.170C>T (p.Thr57Met)          | N                         | N | N | N | N     | N     | N                        | Y | Y | Y | N     | N     | N                          | N | N | N | N     | N     | N                                               | N | N | N | N     | N     | N                                | N | N | N | 5     |       |           |    |
| 7                                                    | c.178C>T (p.Arg60Cys)          | N                         | N | N | N | N     | N     | N                        | N | N | Y | N     | N     | N                          | N | N | N | N     | N     | N                                               | N | N | N | N     | N     | N                                | N | N | N | N     | 1     |           |    |
| 8                                                    | c.238G>C (p.Gly80Arg)          | N                         | Y | N | N | N     | N     | N                        | Y | Y | Y | N     | N     | N                          | N | N | N | N     | N     | N                                               | N | Y | Y | N     | N     | N                                | N | N | N | N     | 6     |           |    |
| 9                                                    | c.320G>A (p.Arg107Gln)         | N                         | N | N | N | N     | N     | Y                        | N | N | Y | N     | N     | N                          | N | N | N | N     | N     | N                                               | N | N | N | Y     | N     | Y                                | N | N | N | N     | 4     |           |    |
| 10                                                   | c.436C>T (p.Arg146Cys)         | Y                         | N | Y | Y | Y     | N     | Y                        | Y | Y | Y | N     | N     | N                          | N | N | N | N     | N     | N                                               | N | N | N | Y     | N     | N                                | N | N | Y | N     | N     | 10        |    |
| 11                                                   | c.442G>A (p.Ala148Thr)         | N                         | N | N | Y | N     | N     | Y                        | Y | N | Y | N     | N     | N                          | N | N | N | N     | N     | N                                               | N | Y | N | N     | N     | Y                                | N | N | N | N     | 6     |           |    |
| variants affecting transmembrane domains             |                                |                           |   |   |   |       |       |                          |   |   |   |       |       |                            |   |   |   |       |       |                                                 |   |   |   |       |       |                                  |   |   |   |       |       |           |    |
| 12                                                   | c.604G>A (p.Ala202Thr)         | N                         | Y | Y | N | N     | N     | N                        | Y | Y | Y | N     | N     | N                          | N | N | N | N     | N     | N                                               | Y | Y | N | N     | N     | N                                | Y | N | N | N     | 8     |           |    |
| 13                                                   | c.922C>T (p.His308Tyr)         | Y                         | Y | N | Y | N     | Y     | Y                        | Y | Y | Y | N     | Y     | Y                          | Y | Y | Y | Y     | N     | Y                                               | Y | Y | Y | Y     | N     | N                                | Y | Y | Y | N     | Y     | 22        |    |
| variants affecting the C-terminal cytoplasmic domain |                                |                           |   |   |   |       |       |                          |   |   |   |       |       |                            |   |   |   |       |       |                                                 |   |   |   |       |       |                                  |   |   |   |       |       |           |    |
| 14                                                   | c.1291C>T (p.Arg431Cys)        | N                         | Y | Y | N | N     | N     | N                        | Y | Y | N | N     | N     | N                          | N | N | N | N     | N     | N                                               | N | Y | N | N     | N     | Y                                | N | N | N | 6     |       |           |    |
| 15 & 16                                              | c.1546A>T (p.Thr516Ser)        | N                         | Y | Y | N | N     | N     | Y                        | N | Y | Y | N     | N     | N                          | N | N | N | N     | N     | N                                               | Y | Y | N | N     | N     | N                                | Y | N | N | N     | 8     |           |    |
| 17                                                   | c.1606A>G (p.Arg536Gly)        | N                         | N | N | N | N     | N     | Y                        | Y | Y | N | N     | N     | N                          | N | N | N | N     | N     | N                                               | N | N | N | N     | N     | N                                | N | N | N | N     | 3     |           |    |
| 18                                                   | c.1733A>T (p.Asn578Ile)        | N                         | Y | N | N | N     | N     | Y                        | Y | N | Y | N     | N     | N                          | N | N | N | N     | N     | N                                               | N | Y | N | N     | N     | N                                | N | N | N | N     | 5     |           |    |

**Table S7. PS3 scoring for functionally expressed *KCND1* variants**

Functional *KCND1* variants were assessed based on significant alterations relative to Kv4.1 WT. For each biophysical parameter and in all channel configurations (t: ternary, a: alone, K: only with KChIP, D: only with DPP) the following questions were asked: 1) Is there a significant difference relative to Kv4.1 WT? Yes (Y) or No (N); 2) Is the  $\beta$ -subunit effect on this biophysical parameter absent (i.e.; no KChIP effect, =  $\pm$  K or no DPP effect, =  $\pm$  D)? Yes (Y) or No (N). Assessment based on the data from Tables S3 - S6; see also Figures S3 - S5.



## Supplemental References

1. Kise, Y., Kasuya, G., Okamoto, H.H., Yamanouchi, D., Kobayashi, K., Kusakizako, T., Nishizawa, T., Nakajo, K., and Nureki, O. (2021). Structural basis of gating modulation of Kv4 channel complexes. *Nature* 599, 158-164.
2. An, W.F., Bowlby, M.R., Betty, M., Cao, J., Ling, H.P., Mendoza, G., Hinson, J.W., Mattsson, K.I., Strassle, B.W., Trimmer, J.S., and Rhodes, K.J. (2000). Modulation of A-type potassium channels by a family of calcium sensors. *Nature* 403, 553-556.
3. Nadal, M.S., Ozaita, A., Amarillo, Y., de Miera, E.V., Ma, Y., Mo, W., Goldberg, E.M., Misumi, Y., Ikehara, Y., Neubert, T.A., and Rudy, B. (2003). The CD26-related dipeptidyl aminopeptidase-like protein DPPX is a critical component of neuronal A-Type K<sup>+</sup> channels. *Neuron* 37, 449-461.
